# Supplementary material for: Proteomic profiling identifies muscle-invasive bladder cancers with distinct biology and responses to platinum-based chemotherapy
Source: Research Square preprint supplement (doi:10.21203/rs.3.rs-4271858/v1), 2024-05-02
Supplement: Supplementary file 1 [file 59e888b1ddf2a6d17aae06e5.xlsx]

## Sheet: F1B
type

## Sheet: F1C
id

## Sheet: F1D
X1

## Sheet: F1E
Nuclear...1

## Sheet: F2A
sex

## Sheet: F2B
CC_cluster_name

## Sheet: F3A
id

## Sheet: F3B_F3C
CC_RC

## Sheet: F3D
Type

## Sheet: F3E
name

[truncated: 45 more sheets: F3F, F3G, F4A, F4B, F4C, F5A, F5B, F5D, F5E, F5F, F5G, S1B, S1C, S1D, S1E, S1F, S1G, S1H, S2A, S2B …]
