# Supplementary material for: Proteomic profiling identifies muscle-invasive bladder cancers with distinct biology and responses to platinum-based chemotherapy
Source: Research Square preprint supplement (doi:10.21203/rs.3.rs-4271858/v1), 2024-05-02
Supplement: Supplementary file 2 [file 9c2baba7396b02e103ae83a5.xlsx]

## Sheet: Sheet1
symbol	uniprot	sequence	size
ACTL6B	O94805	AILDHTYSK	9
ACTL6B	O94805	LIASNSTMER	10
ACTL6B	O94805	DGAEVMSPLK	10
ACTL6B	O94805	IFHIDTNALHVPR	13
ACTL6B	O94805	LRIPEGLFDPSNVK	14
ADAM17	P78536	AQECFQER	8
ADAM17	P78536	NCQFETAQK	9
ADAM17	P78536	GYGIQIEQIR	10
ADAM17	P78536	IIKPFPAPQTPGR	13
ADAM17	P78536	LQPAPVIPSAPAAPK	15
APH1A	Q96BI3	SPISIR	6
APH1A	Q96BI3	VMVYSALR	8
APH1A	Q96BI3	ADEGLASLSEDGR	13
APH1A	Q96BI3	KADEGLASLSEDGR	14
APH1A	Q96BI3	ADEGLASLSEDGRSPISIR	19
APH1B	Q8WW43	VIIDNK	6
APH1B	Q8WW43	NFLLYNQR	8
APH1B	Q8WW43	LCLLCQDK	8
APH1B	Q8WW43	SINPGETAPSMR	12
APH1B	Q8WW43	ASEGLKSINPGETAPSMR	18
APLP1	P51693	VIALINDQR	9
APLP1	P51693	DDTPMTLPK	9
APLP1	P51693	MNPLEQYER	9
APLP1	P51693	VEQATQAIPMER	12
APLP1	P51693	GSTEQDAASPEKEK	14
ARRDC1	Q8N5I2	LGAPLPFR	8
ARRDC1	Q8N5I2	TIAEVEGAGVK	11
ARRDC1	Q8N5I2	DTSPVVASLLQK	12
ARRDC1	Q8N5I2	TGSVVLTASTDLR	13
ARRDC1	Q8N5I2	VVYSPGEPLAGTVR	14
ASH2L	Q9UBL3	DKDIIPFIDK	10
ASH2L	Q9UBL3	DIFEGVYFPAISLYK	15
ASH2L	Q9UBL3	LGWSQPLGNLQAPLGYDK	18
ASH2L	Q9UBL3	FGLLDQDLSNIGPAYDNQK	19
BAX	Q07812	MIAAVDTDSPR	11
BAX	Q07812	GGGPTSSEQIMK	12
BAX	Q07812	TGALLLQGFIQDR	13
BAX	Q07812	IGDELDSNMELQR	13
BAX	Q07812	MGGEAPELALDPVPQDASTK	20
BMP5	P22003	FENETIK	7
BMP5	P22003	SAGLVGR	7
BMP5	P22003	ISIYQIIK	8
BMP5	P22003	MSSVGDYNTSEQK	13
BMP5	P22003	FDLTQIPHGEAVTAAEFR	18
C7	P10643	LTPLYELVK	9
C7	P10643	VLFYVDSEK	9
C7	P10643	DSCTLPASAEK	11
C7	P10643	YSAWAESVTNLPQVIK	16
CASP8	Q14790	FLLQEEISK	9
CASP8	Q14790	IINDYEEFSK	10
CASP8	Q14790	FLSLDYIPQR	10
CASP8	Q14790	VMLYQISEEVSR	12
CASP8	Q14790	NLYDIGEQLDSEDLASLK	18
CASTOR2	A6NHX0	LAFLSSK	7
CASTOR2	A6NHX0	LQVASVAK	8
CASTOR2	A6NHX0	LVQRPVIHPLSSPSNR	16
CASTOR2	A6NHX0	DLPFVTHTLSSEFTILR	17
CASTOR2	A6NHX0	FDHALVPEENINGVISALK	19
CCR7	P32248	LIFAIYK	7
CCR7	P32248	FRNDLFK	7
CCR7	P32248	SSSEQAMR	8
CCR7	P32248	MDLGKPMK	8
CCR7	P32248	DLGCLSQEQLR	11
CD101	Q93033	LKPTGSK	7
CD101	Q93033	AGYSDLK	7
CD101	Q93033	ASQGELQVSK	10
CD101	Q93033	REDEEEDEGN	10
CD101	Q93033	ILEMDQTNVIK	11
CD14	P08571	ATVNPSAPR	9
CD14	P08571	LKELTLEDLK	10
CD14	P08571	LTVGAAQVPAQLLVGALR	18
CD14	P08571	VLSIAQAHSPAFSCEQVR	18
CD14	P08571	AFPALTSLDLSDNPGLGER	19
CD160	O95971	LNLICTVWHK	10
CD160	O95971	SGDCSPETSLK	11
CD160	O95971	LNLICTVWHKK	11
CD160	O95971	KEEAEGFVVFLCKDR	15
CD160	O95971	VWVMLVTSLVALQAL	15
CD163	Q86VB7	TSYQVYSK	8
CD163	Q86VB7	LQEGPTSCSGR	11
CD163	Q86VB7	LVDGVTECSGR	11
CD163	Q86VB7	LEVFYNGAWGTVGK	14
CD163	Q86VB7	GPDTLWQCPSSPWEK	15
CD1C	P29017	FYLFGLTR	8
CD1C	P29017	YPFEVQVK	8
CD1C	P29017	NEQEQLGTK	9
CD1C	P29017	FLLGLLDAGK	10
CD1C	P29017	FLLGLLDAGKMYVHR	15
CD244	Q9BZW8	VDSIAWK	7
CD244	Q9BZW8	VDSIAWKK	8
CD244	Q9BZW8	LLPSQNGFHHILK	13
CD244	Q9BZW8	KLLPSQNGFHHILK	14
CD244	Q9BZW8	NHSPSFNSTIYEVIGK	16
CD27	P26842	NGWQCR	6
CD27	P26842	HYWAQGK	7
CD27	P26842	KPEPACSP	8
CD27	P26842	HCNSGLLVR	9
CD27	P26842	DKECTECDPLPNPSLTAR	18
CD274	Q9NZQ7	NIIQFVHGEEDLK	13
CD274	Q9NZQ7	INTTTNEIFYCTFR	14
CD274	Q9NZQ7	AEVIWTSSDHQVLSGK	16
CD274	Q9NZQ7	DQLSLGNAALQITDVK	16
CD274	Q9NZQ7	LLKDQLSLGNAALQITDVK	19
CD28	P10747	TGFNCDGK	8
CD28	P10747	HYQPYAPPR	9
CD28	P10747	SNGTIIHVK	9
CD28	P10747	LLHSDYMNMTPR	12
CD28	P10747	IEVMYPPPYLDNEK	14
CD33	P20138	FAGAGVTTER	10
CD33	P20138	LDQEVQEETQGR	12
CD33	P20138	NDTHPTTGSASPK	13
CD33	P20138	ILIPGTLEPGHSK	13
CD33	P20138	DSPVATNKLDQEVQEETQGR	20
CD38	P28907	RFPETVLAR	9
CD38	P28907	DLCQDPTIK	9
CD38	P28907	LGTQTVPCNK	10
CD38	P28907	HVDCQSVWDAFK	12
CD38	P28907	VQTLEAWVIHGGR	13
CD3E	P07766	NIGGDEDDK	9
CD3E	P07766	DLYSGLNQR	9
CD3E	P07766	NIGSDEDHLSLK	12
CD3E	P07766	GSKPEDANFYLYLR	14
CD3E	P07766	GQNKERPPPVPNPDYEPIR	19
CD4	P01730	TCQCPHR	7
CD4	P01730	SWITFDLK	8
CD4	P01730	LHQEVNLVVMR	11
CD4	P01730	ILGNQGSFLTK	11
CD4	P01730	SLWDQGNFPLIIK	13
CD40	P25942	ISVQER	6
CD40	P25942	YCDPNLGLR	9
CD40	P25942	SCSPGFGVK	9
CD40	P25942	CHPWTSCETK	10
CD40	P25942	TDVVCGPQDR	10
CD40LG	P29965	LDKIEDER	8
CD40LG	P29965	NLHEDFVFMK	10
CD40LG	P29965	MIETYNQTSPR	11
CD40LG	P29965	SLSLLNCEEIK	11
CD40LG	P29965	GDQNPQIAAHVISEASSK	18
CD47	Q08722	FVASNQK	7
CD47	Q08722	AVEEPLNAFK	10
CD47	Q08722	IEVSQLLKGDASLK	14
CD68	P34810	TTKSHK	6
CD68	P34810	SHKTTTHR	8
CD68	P34810	RRPSAYQAL	9
CD80	P33681	IYWQKEK	7
CD80	P33681	RESVRPV	7
CD80	P33681	YEKDAFK	7
CD80	P33681	REHLAEVTLSVK	12
CD80	P33681	ADFPTPSISDFEIPTSNIR	19
CD86	P42081	LHNLQIK	7
CD86	P42081	FDSVHSKYMGR	11
CD86	P42081	TSSCDKSDTCF	11
CD86	P42081	TSFDSDSWTLR	11
CD86	P42081	CGTNTMEREESEQTK	15
CD8A	P01732	AAEGLDTQR	9
CD8A	P01732	SGDKPSLSAR	10
CD8A	P01732	TWNLGETVELK	11
CD8A	P01732	LGDTFVLTLSDFR	13
CD8A	P01732	GAAASPTFLLYLSQNKPK	18
CDH1	P12830	NDVAPTLMSVPR	12
CDH1	P12830	NTGVISVVTTGLDR	14
CDH1	P12830	DTANWLEINPDTGAISTR	18
CDH2	P19022	LSDPANWLK	9
CDH2	P19022	LNGDFAQLNLK	11
CDH2	P19022	IDPVNGQITTIAVLDR	16
CDH2	P19022	MFVLTVAAENQVPLAK	16
CDH2	P19022	SAAPHPGDIGDFINEGLK	18
CDK2	P24941	LTGEVVALK	9
CDK2	P24941	VVPPLDEDGR	10
CDK2	P24941	LLDVIHTENK	10
CDK2	P24941	LDTETEGVPSTAIR	14
CDK2	P24941	DLKPQNLLINTEGAIK	16
CEACAM8	P31997	GETVDANR	8
CEACAM8	P31997	LFIPNITTK	9
CEACAM8	P31997	NDTGSYTLQVIK	12
CEACAM8	P31997	ATVSIMIGVLAR	12
CEACAM8	P31997	IIGYVISNQQITPGPAYSNR	20
CIR1	Q86X95	NSGFALK	7
CIR1	Q86X95	SFANFMCK	8
CIR1	Q86X95	NPGEEQSR	8
CIR1	Q86X95	DQPFGIQVR	9
CIR1	Q86X95	LHEELSSSHHNR	12
CKS1B	P61024	HVMLPK	6
CKS1B	P61024	DIAKLVPK	8
CKS1B	P61024	YDDEEFEYR	9
CKS1B	P61024	THLMSESEWR	10
CKS1B	P61024	YDDEEFEYRHVMLPK	15
CLDN3	O15551	VVYSAPR	7
CLDN3	O15551	DFYNPVVPEAQK	12
CLDN3	O15551	DFYNPVVPEAQKR	13
CLDN3	O15551	STGPGASLGTGYDR	14
CLDN3	O15551	STGPGASLGTGYDRK	15
CLDN4	O14493	SAAASNYV	8
CLDN4	O14493	TDKPYSAK	8
CLDN4	O14493	CTNCLEDESAK	11
CLDN4	O14493	CTNCLEDESAKAK	13
CLDN4	O14493	TDKPYSAKYSAAR	13
CLDN7	O95471	AGYRVPR	7
CLDN7	O95471	SNSSKEYV	8
CLDN7	O95471	CGGDDKVK	8
CLDN7	O95471	MYDSVLALSAALQATR	16
CLDN7	O95471	GLWMDCVTQSTGMMSCK	17
COL17A1	Q9UMD9	IVTETVTTR	9
COL17A1	Q9UMD9	LQSASPSTR	9
COL17A1	Q9UMD9	KEMELLIMTK	10
COL17A1	Q9UMD9	LLSTDASHSR	10
COL17A1	Q9UMD9	SELISYLTSPDVR	13
COMP	P49747	NQADNCPR	8
COMP	P49747	SSTGPGEQLR	10
COMP	P49747	DTDLDGFPDEK	11
COMP	P49747	NALWHTGDTESQVR	14
COMP	P49747	NTDEDKWGDACDNCR	15
CRTAC1	Q9NQ79	GVASLFAGR	9
CRTAC1	Q9NQ79	GVALADFNR	9
CRTAC1	Q9NQ79	DVAAEAGVSK	10
CRTAC1	Q9NQ79	GNQGFNNNWLR	11
CRTAC1	Q9NQ79	DEASSVEVTWPDGK	14
CTBP1	Q13363	ATWLHQALR	9
CTBP1	Q13363	IGSGFDNIDIK	11
CTBP1	Q13363	GETLGIIGLGR	11
CTBP1	Q13363	IRGETLGIIGLGR	13
CTBP1	Q13363	DVATVAFCDAQSTQEIHEK	19
CTBP2	P56545	IGSGYDNVDIK	11
CTBP2	P56545	GETLGLIGFGR	11
CTBP2	P56545	IRGETLGLIGFGR	13
CTBP2	P56545	DLATVAFCDAQSTQEIHEK	19
CTBP2	P56545	GAALDVHESEPFSFAQGPLK	20
CTLA4	P16410	MACLGFQR	8
CTLA4	P16410	AMDTGLYICK	10
CTLA4	P16410	RSPLTTGVYVK	11
CTLA4	P16410	GIASFVCEYASPGKATEVR	19
CTLA4	P16410	SPLTTGVYVKMPPTEPECEK	20
CTSE	P14091	RHPSLK	6
CTSE	P14091	VGLAPAVP	8
CTSE	P14091	SQLSEFWK	8
CTSE	P14091	VPLRRHPSLK	10
CTSE	P14091	SHNLDMIQFTESCSMDQSAK	20
CUL1	Q13616	MAQSSSK	7
CUL1	Q13616	FINNNAVTK	9
CUL1	Q13616	MFQDIGVSK	9
CUL1	Q13616	AGIQQVYTR	9
CUL1	Q13616	YIEDKDVFQK	10
CXCL11	O14625	VADIEK	6
CXCL11	O14625	AVKVADIEK	9
CXCL11	O14625	GRCLCIGPGVK	11
CXCL11	O14625	ASIMYPSNNCDK	12
CXCR5	P32302	FRSDLSR	7
CXCR5	P32302	AVDNTCK	7
CXCR5	P32302	TVIALHK	7
CXCR5	P32302	VSQGHHNNSLPR	12
CXCR5	P32302	CTFSQENQAETHAWFTSR	18
DLL4	Q9NR61	DDSSGGGR	8
DLL4	Q9NR61	LRRPDDGSR	9
DLL4	Q9NR61	DNLIPAAQLK	10
DLL4	Q9NR61	VICSDNYYGDNCSR	14
DLL4	Q9NR61	SASGWALLLLVALWQQR	17
DOCK2	Q92608	DILLPVITK	9
DOCK2	Q92608	VVFTDLGNK	9
DOCK2	Q92608	SVENFVNLVK	10
DOCK2	Q92608	MNTTSAPGDDVK	12
DOCK2	Q92608	MKPQLLQENLEK	12
DSC3	Q14574	IKENLAVGSK	10
DSC3	Q14574	GGNQTLESCR	10
DSC3	Q14574	GVDKEPLNLFYIER	14
DSC3	Q14574	IPIEDKDLINTANWR	15
DSC3	Q14574	GWITIDEISGSIITSK	16
DTX1	Q86Y01	SKNPEDVVR	9
DTX1	Q86Y01	HCYLPNNEK	9
DTX1	Q86Y01	AASNAILASQR	11
DTX1	Q86Y01	HKGVRPELVGR	11
DTX1	Q86Y01	ASIPPGVPALPVK	13
DTX2	Q86UW9	NYTEELK	7
DTX2	Q86UW9	TGTQPQGK	8
DTX2	Q86UW9	DGSLQCPSCK	10
DTX2	Q86UW9	APQPTSPPASR	11
DTX2	Q86UW9	AIGSLAVGHLTK	12
DTX3	Q8N9I9	VQEELR	6
DTX3	Q8N9I9	DATLLLPSYEK	11
DTX3	Q8N9I9	VAYLPDCPEGNK	12
DTX3	Q8N9I9	VTVSKPVWDFLSK	13
DTX3	Q8N9I9	FYGQLVGNQPQNGR	14
DTX3L	Q8TDB6	LESYFQSSK	9
DTX3L	Q8TDB6	GSVSSEASELDK	12
DTX3L	Q8TDB6	DSCISPSEPETK	12
DTX3L	Q8TDB6	VLGVSDVITWNDIHHK	16
DTX3L	Q8TDB6	GGELTLLGTQDDISAAK	17
DTX4	Q9Y2E6	LAIAQSR	7
DTX4	Q9Y2E6	TPEEVLK	7
DTX4	Q9Y2E6	TAPSQVIRR	9
DTX4	Q9Y2E6	LAPYIIDLQSMNQFR	15
DTX4	Q9Y2E6	AAVVNGSTGPLQLPVTR	17
EIF2AK4	Q9P2K8	TGIAQLVK	8
EIF2AK4	Q9P2K8	GLSNESVNLLK	11
EIF2AK4	Q9P2K8	VLETELVDHVLQK	13
EIF2AK4	Q9P2K8	VLSASNVLVDAEGTVK	16
EIF2AK4	Q9P2K8	IGDFGLATDHLAFSADSK	18
ENTPD1	P49961	TSYAGVK	7
ENTPD1	P49961	VLDVVER	7
ENTPD1	P49961	MESEELADR	9
ENTPD1	P49961	FCAQPWEEIK	10
ENTPD1	P49961	SLSNYPFDFQGAR	13
EOMES	O95936	TSPTVFSEDQLSK	13
EOMES	O95936	WLVTPVQQPGTNK	13
EOMES	O95936	TSPTVFSEDQLSKEK	15
EOMES	O95936	VKEEIGSSWIETPPSIK	17
EOMES	O95936	LHIVEVTEDGVEDLNEPSK	19
FADD	Q13158	IDSIEDR	7
FADD	Q13158	IDSIEDRYPR	10
FADD	Q13158	NTEKENATVAHLVGALR	17
FADD	Q13158	SCQMNLVADLVQEVQQAR	18
FADD	Q13158	SGAMSPMSWNSDASTSEAS	19
FAS	P25445	IQTIILK	7
FAS	P25445	ANLCTLAEK	9
FAS	P25445	NDNVQDTAEQK	11
FAS	P25445	DITSDSENSNFR	12
FAS	P25445	IDEIKNDNVQDTAEQK	16
FASLG	P48023	VAHLTGK	7
FASLG	P48023	YPQDLVMMEGK	11
FASLG	P48023	MMSYCTTGQMWAR	13
FASLG	P48023	NSKYPQDLVMMEGK	14
FCGR1A	P12314	VFTEGEPLALR	11
FCGR1A	P12314	YTSAGISVTVK	11
FCGR1A	P12314	WDLEISLDSGHEK	13
FCGR1A	P12314	HRYTSAGISVTVK	13
FCGR1A	P12314	REDSGLYWCEAATEDGNVLK	20
FCGR2B	P31994	ISALPGYPECR	11
FCGR2B	P31994	RISALPGYPECR	12
FCGR3A	P08637	TNIRSSTR	8
FCGR3A	P08637	VLEKDSVTLK	10
FCGR3A	P08637	AVVFLEPQWYR	11
FCGR3A	P08637	YFHHNSDFYIPK	12
FCGR3A	P08637	KYFHHNSDFYIPK	13
FOXP3	Q9BZS1	MFAFFR	6
FOXP3	Q9BZS1	ASDLLGAR	8
FOXP3	Q9BZS1	VFEEPEDFLK	10
FOXP3	Q9BZS1	LSAMQAHLAGK	11
FOXP3	Q9BZS1	LSAMQAHLAGKMALTK	16
GATA3	P23771	VHDSLEDFPK	10
GATA3	P23771	NSSFNPAALSR	11
GATA3	P23771	AGTSCANCQTTTTTLWR	17
GATA3	P23771	ALGSHHTASPWNLSPFSK	18
GATA3	P23771	DVSPDPSLSTPGSAGSAR	18
GCN1	Q92616	LYRPPPVLDALGR	13
GNG4	P50150	AVEQLK	6
GNG4	P50150	KAVEQLK	7
GNG4	P50150	MEACMDR	7
GNG4	P50150	MKEGMSNNSTTSISQAR	17
GNG4	P50150	VSQAAADLLAYCEAHVR	17
GRHL2	Q6ISB3	GLMEAISEK	9
GRHL2	Q6ISB3	AYTSEDEAWK	10
GRHL2	Q6ISB3	ASDSQEDQEKR	11
GRHL2	Q6ISB3	GQASQTQCNSSSDGK	15
GRHL2	Q6ISB3	TVPVNLSLNQDHLENSK	17
GSDMC	Q9BYG8	MELDNPR	7
GSDMC	Q9BYG8	MPSMLER	7
GSDMC	Q9BYG8	IALWITYGK	9
GSDMC	Q9BYG8	KLLDPEPSFLK	11
GSDMC	Q9BYG8	GQGQGESLRVK	11
GZMB	P10144	MTVQEDR	7
GZMB	P10144	HSHTLQEVK	9
GZMB	P10144	VSSFVHWIK	9
GZMB	P10144	VAQGIVSYGR	10
GZMB	P10144	GDSGGPLVCNK	11
HAVCR2	Q8TDQ0	YWLNGDFR	8
HAVCR2	Q8TDQ0	DVNYWTSR	8
HAVCR2	Q8TDQ0	DFTAAFPR	8
HAVCR2	Q8TDQ0	IQIPGIMNDEK	11
HAVCR2	Q8TDQ0	GACPVFECGNVVLR	14
HBS1L	Q9Y450	STGEVTK	7
HBS1L	Q9Y450	SESEIVPK	8
HBS1L	Q9Y450	SQSSELTK	8
HBS1L	Q9Y450	GPPIEDAIASSDVLETASK	19
HBS1L	Q9Y450	GQNALVELQTQRPIALELYK	20
HDAC1	Q13547	ANAEEMTK	8
HDAC1	Q13547	KEVTEEEK	8
HDAC1	Q13547	YHSDDYIK	8
HDAC1	Q13547	YYAVNYPLR	9
HDAC1	Q13547	DGIDDESYEAIFKPVMSK	18
HDAC2	Q92769	YHSDEYIK	8
HDAC2	Q92769	LGCFNLTVK	9
HDAC2	Q92769	TFNLPLLMLGGGGYTIR	17
HDAC2	Q92769	DGIDDESYGQIFKPIISK	18
HES1	Q14469	ADILEMTVK	9
HES1	Q14469	TLILDALKK	9
HES1	Q14469	LGSQAGEAAK	10
HES1	Q14469	AGFSECMNEVTR	12
HES1	Q14469	FLSTCEGVNTEVR	13
HES2	Q9Y543	LLEHLWR	7
HES2	Q9Y543	AGDAAELR	8
HES2	Q9Y543	RAGDAAELR	9
HES2	Q9Y543	VLEPAVSAR	9
HES2	Q9Y543	LEKADVLEMTVR	12
HES4	Q9HCC6	TLILDALR	8
HES4	Q9HCC6	ADILEMTVR	9
HES4	Q9HCC6	TLILDALRK	9
HES4	Q9HCC6	INESLAQLK	9
HES4	Q9HCC6	YRAGFHECLAEVNR	14
HES5	Q5TA89	KPVVEK	6
HES5	Q5TA89	HQPNSK	6
HES5	Q5TA89	INSSIEQLK	9
HES5	Q5TA89	MAPSTVAVELLSPK	14
HES5	Q5TA89	LLYHFQRPPAAPAAPAK	17
HES7	Q9BYE0	LLLLER	6
HES7	Q9BYE0	TRDQNLR	7
HES7	Q9BYE0	MLKPLVEK	8
HES7	Q9BYE0	DQNLRNPK	8
HES7	Q9BYE0	LEKAEILEFAVGYLR	15
HEY1	Q9Y5J3	MLHTAGGK	8
HEY1	Q9Y5J3	LGSAHPEAPALR	12
HEY1	Q9Y5J3	GYFDAHALAMDYR	13
HEY1	Q9Y5J3	YLSIIEGLDASDPLR	15
HEY1	Q9Y5J3	APPSGSLGPVLPVVTSASK	19
HEY2	Q9UBP5	MLQATGGK	8
HEY2	Q9UBP5	LVSHLSTCATQR	12
HEY2	Q9UBP5	LNSPTTTSQIMAR	13
HEY2	Q9UBP5	LNSPTTTSQIMARK	14
HEY2	Q9UBP5	GYFDAHALAMDFMSIGFR	18
HEYL	Q9NQ87	INSSLSELR	9
HEYL	Q9NQ87	INSSLSELRR	10
HEYL	Q9NQ87	ALAVDFRSIGFR	12
HEYL	Q9NQ87	LVPTAFEKQGSSK	13
HEYL	Q9NQ87	ARPLERPATPVPVAPSSR	18
HLA-DPA1	P20036	TDYSFHK	7
HLA-DPA1	P20036	PEDRMFHIR	9
HLA-DPA1	P20036	VEHWGLDQPLLK	12
HLA-DPA1	P20036	FHYLTFVPSAEDFYDCR	17
HNF1A	P20823	SYLQQHNIPQR	11
HNF1A	P20823	AVVETLLQEDPWR	13
HNF1A	P20823	GELAELPNGLGETR	14
HNF1A	P20823	GVSPSQAQGLGSNLVTEVR	19
HNF1A	P20823	LSQLQTELLAALLESGLSK	19
ICOS	Q9Y6W8	AVNTAKK	7
ICOS	Q9Y6W8	GSGNTVSIK	9
ICOS	Q9Y6W8	GGQILCDLTK	10
ICOS	Q9Y6W8	SGLWYFFLFCLR	12
ICOS	Q9Y6W8	YSSSVHDPNGEYMFMR	16
IDO1	P14902	GDAGLR	6
IDO1	P14902	NIAVPYCQLSK	11
IDO1	P14902	GTGGTDLMNFLK	12
IDO1	P14902	HLPDLIESGQLR	12
IDO1	P14902	NFLCSLESNPSVR	13
IFNG	P01579	SVETIK	6
IFNG	P01579	SVETIKEDMNVK	12
IFNG	P01579	LTNYSVTDLNVQRK	14
IFNG	P01579	AIHELIQVMAELSPAAK	17
IFNG	P01579	KAIHELIQVMAELSPAAK	18
IL10	P22301	NAFNKLQEK	9
IL10	P22301	AVEQVKNAFNK	11
IL10	P22301	AHVNSLGENLKTLR	14
IL10	P22301	TFFQMKDQLDNLLLK	15
IL10	P22301	DQLDNLLLKESLLEDFK	17
IL2RA	P01589	GPAESVCK	8
IL2RA	P01589	AMAYKEGTMLNCECK	15
IL2RA	P01589	IYHFVVGQMVYYQCVQGYR	19
IL3RA	P26951	YELQIQK	7
IL3RA	P26951	TDAQGTR	7
IL3RA	P26951	THSFMHWK	8
IL3RA	P26951	MQPVITEQVR	10
IL3RA	P26951	LSSGSQSSHILVR	13
ITCH	Q96J02	CNNTNSPK	8
ITCH	Q96J02	NYEQWQLQR	9
ITCH	Q96J02	FIYGNQDLFATSQSK	15
ITCH	Q96J02	SQGQLNEKPLPEGWEMR	17
ITCH	Q96J02	VSTNGSDDPEDAGAGENRR	19
ITGAE	P38570	TPGPLHR	7
ITGAE	P38570	RTPGPLHR	8
ITGAE	P38570	GLQVVAVK	8
ITGAE	P38570	FAIGVGEEFK	10
ITGAE	P38570	VDTGDCYSNK	10
ITGAM	P11215	TEFQLELPVK	10
ITGAM	P11215	LFTALFPFEK	10
ITGAM	P11215	LPSHSDFLAELR	12
ITGAM	P11215	GFGQSVVQLQGSR	13
ITGAM	P11215	VVVGAPQEIVAANQR	15
ITGAX	P20702	ATFQETK	7
ITGAX	P20702	AQTTTVLEK	9
ITGAX	P20702	YQVNNLGQR	9
ITGAX	P20702	YFTASLPFEK	10
ITGAX	P20702	LTDVVIGAPGEEENR	15
JAG1	P78504	IIDLVSK	7
JAG1	P78504	SSSLQPVK	8
JAG1	P78504	DLESAQSLNR	10
JAG1	P78504	DLVNDFYCDCK	11
JAG1	P78504	ASHSGMINPSR	11
JAG2	Q9Y219	NFTPPPR	7
JAG2	Q9Y219	GEEDSLEAEK	10
JAG2	Q9Y219	CTCPDGYSGR	10
JAG2	Q9Y219	SPGRPAHWASGPK	13
JAG2	Q9Y219	AGGCGHDECDTYVR	14
KDM5A	P29375	TQSESGDVSR	10
KDM5A	P29375	FWELQGSTLK	10
KDM5A	P29375	NLLDDVEEFHER	12
KDM5A	P29375	SLEPPVLELSPGAK	14
KDM5A	P29375	FLHIMEDDSMEEKPLK	16
KRT14	P02533	YETELNLR	8
KRT14	P02533	DAEEWFFTK	9
KRT14	P02533	VVSTHEQVLR	10
KRT14	P02533	TKYETELNLR	10
KRT5	P13647	LAELEEALQK	10
KRT5	P13647	NMQDLVEDFK	10
KRT5	P13647	SFSTASAITPSVSR	14
L1CAM	P32004	FHILFK	6
L1CAM	P32004	VQAVNSQGK	9
L1CAM	P32004	DATQITQGPR	10
L1CAM	P32004	WRPVDLAQVK	10
L1CAM	P32004	AQLLVVGSPGPVPR	14
LAG3	P18627	GDFSLWLRPAR	11
LAG3	P18627	FVWSSLDTPSQR	12
LAG3	P18627	LGQASMTASPPGSLR	15
LAG3	P18627	FSALEQGIHPPQAQSK	16
LAG3	P18627	RFSALEQGIHPPQAQSK	17
LFNG	Q8NES3	DVFIAVK	7
LFNG	Q8NES3	LLASYPHTR	9
LFNG	Q8NES3	WFCHVDDDNYVNLR	14
LFNG	Q8NES3	MSPWASGGHFMNTAER	16
LFNG	Q8NES3	DVYVGKPSLDRPIQAMER	18
LGALS9	O00182	THMPFQK	7
LGALS9	O00182	KTHMPFQK	8
LGALS9	O00182	VAVDGQHLFEYYHR	14
MAEA	Q7L5Y9	VQEYPTLK	8
MAEA	Q7L5Y9	MMVEHLLR	8
MAEA	Q7L5Y9	VPYETLNK	8
MAEA	Q7L5Y9	IQEFIELIR	9
MAEA	Q7L5Y9	AVESIQAEDESAK	13
MAML1	Q92585	YEAVSPER	8
MAML1	Q92585	AGLHCTQAYPVR	12
MAML1	Q92585	YEAVSPERLELER	13
MAML1	Q92585	TEFSPAAFEQEQLGSPQVR	19
MAML1	Q92585	ADNPSPNLMPASAQAQNAQR	20
MAML2	Q8IZL2	SPLPLQQK	8
MAML2	Q8IZL2	IAPQDQINR	9
MAML2	Q8IZL2	TEPGNDDWMK	10
MAML2	Q8IZL2	STPRPSLPMEK	11
MAML2	Q8IZL2	KQVVNLSPANSK	12
MAML3	Q96JK9	SGAGTGK	7
MAML3	Q96JK9	TLEQRAK	7
MAML3	Q96JK9	HSTVVER	7
MAML3	Q96JK9	RHHVNCENR	9
MAML3	Q96JK9	LQSLMGTVQQGAQSWQQR	18
MGP	P08493	AKVQER	6
MGP	P08493	SKPVHELNR	9
MGP	P08493	NANTFISPQQR	11
MGP	P08493	RNANTFISPQQR	12
MGP	P08493	YAMVYGYNAAYNR	13
MLH1	P40692	ASYSDGK	7
MLH1	P40692	GTSEMSEK	8
MLH1	P40692	NQSLEGDTTK	10
MLH1	P40692	TLPNASTVDNIR	12
MLH1	P40692	STTSLTSSSTSGSSDK	16
MMP1	P03956	TYFFVANK	8
MMP1	P03956	ADVDHAIEK	9
MMP1	P03956	LTFDAITTIR	10
MMP1	P03956	VTGKPDAETLK	11
MMP1	P03956	SQNPVQPIGPQTPK	14
MRC1	P22897	SCVSLNPGK	9
MRC1	P22897	YTNWAADEPK	10
MRC1	P22897	SQGPEIVEVEK	11
MRC1	P22897	TGIAGGLWDVLK	12
MRC1	P22897	YLNWLPGSPSAEPGK	15
MS4A1	P11836	KEQTIEIK	8
MS4A1	P11836	MESLNFIR	8
MS4A1	P11836	SNIVLLSAEEK	11
MS4A1	P11836	SNIVLLSAEEKK	12
MS4A1	P11836	MSSLVGPTQSFFMR	14
MSI1	O43347	HELDSK	6
MSI1	O43347	VDDAMLMFDK	10
MSI1	O43347	GFGFVTFMDQAGVDK	15
MSI1	O43347	IFVGGLSVNTTVEDVK	16
MSI1	O43347	SYTGLAPGYTYQFPEFR	17
NCAM1	P13591	TVPNDATQTK	10
NCAM1	P13591	AVGEEVWHSK	10
NCAM1	P13591	AGEQDATIHLK	11
NCAM1	P13591	GLGEISAASEFK	12
NCAM1	P13591	TQPVQGEPSAPK	12
NCOR2	Q9Y618	LQEGSLSSSK	10
NCOR2	Q9Y618	YDTGASTTGSK	11
NCOR2	Q9Y618	AISSASIEGLMGR	13
NCOR2	Q9Y618	GTALGSVPGGSITK	14
NCOR2	Q9Y618	GIITAVEPSTPTVLR	15
NCR1	O76036	VTFYCR	6
NCR1	O76036	SSHVQR	6
NCR1	O76036	FYIPDMNSR	9
NCR1	O76036	LDTATSMFLLLK	12
NCR1	O76036	MSSTLPALLCVGLCLSQR	18
NCSTN	Q92542	MVYDMEK	7
NCSTN	Q92542	LLYGFLIK	8
NCSTN	Q92542	ALADVATVLGR	11
NCSTN	Q92542	SGAGVPAVILR	11
NCSTN	Q92542	NQVEDLLATLEK	12
NOTCH1	P46531	VLHTNVVFK	9
NOTCH1	P46531	VLLDHFANR	9
NOTCH1	P46531	LQSGMVPNQYNPLR	14
NOTCH1	P46531	NGGTCDLLTLTEYK	14
NOTCH1	P46531	LLEASADANIQDNMGR	16
NOTCH2	Q04721	CQSSCGQVK	9
NOTCH2	Q04721	NIDDCPNHR	9
NOTCH2	Q04721	ALGTLLHTNLR	11
NOTCH2	Q04721	STMPTSLPNLAK	12
NOTCH2	Q04721	SLPGEQEQEVAGSK	14
NOTCH3	Q9UM47	AAQSGSK	7
NOTCH3	Q9UM47	LLLDHFANR	9
NOTCH3	Q9UM47	AGLGPQGPR	9
NOTCH3	Q9UM47	GVCQSSVVAGTAR	13
NOTCH3	Q9UM47	CEAPAAAPEVSEEPR	15
NOTCH4	Q99466	VLSLTLR	7
NOTCH4	Q99466	AEEKLGGTR	9
NOTCH4	Q99466	LEDPCPPSFCSK	12
NOTCH4	Q99466	DVNECFQDPGPCPK	14
NOTCH4	Q99466	SLSGVGAGGGPTPR	14
NR3C1	P04150	LLVDFPK	7
NR3C1	P04150	STSVPENPK	9
NR3C1	P04150	GQTGTNGGNVK	11
NR3C1	P04150	GSVSNAQQPDLSK	13
NR3C1	P04150	GIQQATTGVSQETSENPGNK	20
NRARP	Q7Z6K4	FGADIR	6
NRARP	Q7Z6K4	YAASGR	6
NRARP	Q7Z6K4	IFQEAVR	7
NRARP	Q7Z6K4	IFQEAVRK	8
NRARP	Q7Z6K4	MSQAELSTCSAPQTQR	16
NT5E	P21589	VIYPAVEGR	9
NT5E	P21589	LDNYSTQELGK	11
NT5E	P21589	GAEVAHFMNALR	12
NUMB	P49757	DLIVDQTIEK	10
NUMB	P49757	VTTATEQAER	10
NUMB	P49757	AVLWVSADGLR	11
NUMB	P49757	TNPSPTNPFSSDLQK	15
NUMB	P49757	VTTATEQAEREEIMK	15
NUMBL	Q9Y6R0	DLLVDQTIEK	10
NUMBL	Q9Y6R0	WLEEVSQVAK	10
NUMBL	Q9Y6R0	TKDLLVDQTIEK	12
NUMBL	Q9Y6R0	ATVEKPSNPFSGDLQK	16
NUMBL	Q9Y6R0	GEAGTPVAAGTTAAAIPR	18
PADI3	Q9ULW8	DFLHAQK	7
PADI3	Q9ULW8	LTICPQAENR	10
PADI3	Q9ULW8	TISINQVLSNK	11
PADI3	Q9ULW8	ILIGGNLPGSSGR	13
PADI3	Q9ULW8	ATAFFPDLVNMLVLGK	16
PDCD1	Q15116	LAAFPEDR	8
PDCD1	Q15116	AQIKESLR	8
PDCD1	Q15116	VTQLPNGR	8
PDCD1	Q15116	DFHMSVVR	8
PDCD1	Q15116	NDSGTYLCGAISLAPK	16
PDCD1LG2	Q9BQ51	INTHILK	7
PDCD1LG2	Q9BQ51	LKPPPGR	7
PDCD1LG2	Q9BQ51	ASFHIPQVQVR	11
PDCD1LG2	Q9BQ51	ATLLEEQLPLGK	12
PDCD1LG2	Q9BQ51	TPEGLYQVTSVLR	13
PEG10	Q86TG7	HVFEDPQR	8
PEG10	Q86TG7	LTEENTTLR	9
PEG10	Q86TG7	VCFVTSMMTGR	11
PEG10	Q86TG7	RRDELSEEINNLR	13
PEG10	Q86TG7	SLSALIGQCIHIER	14
PELO	Q9BRX2	ALDDFYK	7
PELO	Q9BRX2	VEVNIPR	7
PELO	Q9BRX2	GTNIQENEYVK	11
PELO	Q9BRX2	VQTESSTGSVGSNR	14
PELO	Q9BRX2	ANEAMAIDTLLISDELFR	18
PGM5	Q15124	DLEALVTDK	9
PGM5	Q15124	TIFDFHAIK	9
PGM5	Q15124	GLLTGPSQLK	10
PGM5	Q15124	VEIVDPVDIYLNLLR	15
PGM5	Q15124	FNVANGGPAPDVVSDK	16
PI3	P19957	DTDCPGIK	8
PI3	P19957	DTDCPGIKK	9
PI3	P19957	CAMLNPPNR	9
PI3	P19957	VPFNGQDPVK	10
PI3	P19957	CLKDTDCPGIK	11
PLEKHG4B	Q96PX9	LQQLEHLR	8
PLEKHG4B	Q96PX9	LEGGTVLAR	9
PLEKHG4B	Q96PX9	LVLEDPLLVSLR	12
PLEKHG4B	Q96PX9	KTQSFEIPQPDSGPR	15
PLEKHG4B	Q96PX9	SLSSPSGLHPAEEDGR	16
PSEN1	P49768	YNAESTER	8
PSEN1	P49768	SLGHPEPLSNGRPQGNSR	18
PSEN1	P49768	AAVQELSSSILAGEDPEER	19
PSEN1	P49768	DGQLIYTPFTEDTETVGQR	19
PSEN1	P49768	KDGQLIYTPFTEDTETVGQR	20
PSEN2	P49810	TSLMSAESPTPR	12
PSEN2	P49810	SQENEEDGEEDPDR	14
PSEN2	P49810	MLTFMASDSEEEVCDER	17
PSEN2	P49810	NGQLIYTPFTEDTPSVGQR	19
PSEN2	P49810	YVCSGVPGRPPGLEEELTLK	20
PSENEN	Q9NZ42	LNLCRK	6
PSENEN	Q9NZ42	VSNEEK	6
PSENEN	Q9NZ42	MNLERVSNEEK	11
PSENEN	Q9NZ42	VSNEEKLNLCRK	12
PSENEN	Q9NZ42	WGALGDYLSFTIPLGTP	17
RBPJ	Q06330	FGERPPPK	8
RBPJ	Q06330	GDQTVLILHAK	11
RBPJ	Q06330	NADLCIASGTK	11
RBPJ	Q06330	DGYIHYGQTVK	11
RBPJ	Q06330	IIQFQATPCPK	11
RBPJL	Q9UBG7	VSLFNR	6
RBPJL	Q9UBG7	SLPGTWTR	8
RBPJL	Q9UBG7	SSPEHTTILR	10
RBPJL	Q9UBG7	LNFEQQPDSR	10
RBPJL	Q9UBG7	SEMQLQSEADRR	12
RFNG	Q9Y644	WFCHVDDDNYVNAR	14
RFNG	Q9Y644	SIHCLLYPDTDWCPR	15
RFNG	Q9Y644	LLHSPLFHSHLENLQR	16
RFNG	Q9Y644	LPDDCTVGYIVEGLLGAR	18
RFNG	Q9Y644	MSPWASLGSFMSTAEQVR	18
RND2	P52198	MEGQSGR	7
RND2	P52198	IVVVGDAECGK	11
RND2	P52198	DVFHVATVASLGR	13
RND2	P52198	LIPVTHEQGTVLAK	14
RORC	P51449	SNIFSR	6
RORC	P51449	AGAMEVVLVR	10
RORC	P51449	DSLHAEVQKQLQQR	14
RORC	P51449	ASGSGPSYSNNLAK	14
RORC	P51449	AGLNGASCHLEYSPER	16
SAA1	P0DJI8	GPGGVWAAEAISDAR	15
SAA1	P0DJI8	SGKDPNHFRPAGLPEK	16
SAA1	P0DJI8	RGPGGVWAAEAISDAR	16
SAA1	P0DJI8	FFGHGAEDSLADQAANEWGR	20
SAA1	P0DJI8	GPGGVWAAEAISDARENIQR	20
SFRP4	Q6FHJ7	SSSPIPR	7
SFRP4	Q6FHJ7	SIQWEER	7
SFRP4	Q6FHJ7	VKPTLATYLSK	11
SFRP4	Q6FHJ7	SGCNEVTTVVDVK	13
SFRP4	Q6FHJ7	GVCISPEAIVTDLPEDVK	18
SGCD	Q92629	SLVMEAPK	8
SGCD	Q92629	VLTQLITGPK	10
SGCD	Q92629	VLGAEGTVFPK	11
SGCD	Q92629	LEGDSEFLQPLYAK	14
SGCD	Q92629	LLFSADNNEVVVGAER	16
SHH	Q15465	KVFYVIETR	9
SHH	Q15465	VFYVIETREPR	11
SHH	Q15465	VYVVAERDGDR	11
SHH	Q15465	LAHALLAALAPAR	13
SHH	Q15465	DLSPGDRVLAADDQGR	16
SLFN11	Q7Z7L1	IVNVLK	6
SLFN11	Q7Z7L1	ILEEGPFHK	9
SLFN11	Q7Z7L1	DVAVLVSTAK	10
SLFN11	Q7Z7L1	AACALLNSGGGVIR	14
SLFN11	Q7Z7L1	TADPAILPNVLICLASR	17
SNAI1	O95863	KPSDPNR	7
SNAI1	O95863	MPRSFLVR	8
SNAI1	O95863	SFLVRKPSDPNR	12
SNAI1	O95863	VAELTSLSDEDSGK	14
SNAI1	O95863	THTGEKPFSCPHCSR	15
SNW1	Q13573	LAEALYIADR	10
SNX31	Q8N9S9	SDALGGR	7
SNX31	Q8N9S9	TLNQNLELR	9
SNX31	Q8N9S9	YHIQQSQQK	9
SNX31	Q8N9S9	IEIITSDTAER	11
SNX31	Q8N9S9	YSQLHGWNEQLRR	13
SOX2	P48431	LLSETEK	7
SOX2	P48431	NSPDRVK	7
SOX2	P48431	APCQAGDLR	9
SOX2	P48431	SEASSSPPVVTSSSHSR	17
SOX2	P48431	DMISMYLPGAEVPEPAAPSR	20
SPDYE3	A6NKU9	FQFFCSMR	8
SPDYE3	A6NKU9	THSHIPLRPK	10
SPDYE3	A6NKU9	VSLVLPEYYEAFNR	14
SPDYE3	A6NKU9	MTSHQPQPQEEQSPQR	16
SPDYE6	P0CI01	HRFQLYR	7
SPDYE6	P0CI01	WFQLGHSMNPR	11
SPDYE6	P0CI01	RWFQLGHSMNPR	12
SPDYE6	P0CI01	WFQLGHSMNPRAR	13
SPEN	Q96T58	GTQTGVEQPR	10
SPEN	Q96T58	LQVSQTEPAK	10
SPEN	Q96T58	TDYNEPGTIPSAAR	14
SPEN	Q96T58	AEKPDATADAEPDANQK	17
SPEN	Q96T58	VDATRPEATTEVGPQIGVK	19
TBX21	Q9UL17	FYPDLPGQAK	10
TBX21	Q9UL17	VALNNHLLWSK	11
TBX21	Q9UL17	FNQHQTEMIITK	12
TBX21	Q9UL17	DVVPQAYWLGAPR	13
TBX21	Q9UL17	LYVHPDSPNTGAHWMR	16
TGFB1	P01137	AQHLQSSR	8
TGFB1	P01137	TIDMELVK	8
TGFB1	P01137	GGEIEGFR	8
TGFB1	P01137	VEQLSNMIVR	10
TGFB1	P01137	VAGESAEPEPEPEADYYAK	19
TGM1	P22735	AIGTLIVTK	9
TGM1	P22735	GTHVIIPVGK	10
TGM1	P22735	IYYGTEAQIGER	12
TGM1	P22735	GSGVNAAGDGTIR	13
TGM1	P22735	YDTPFIFAEVNSDK	14
THBD	P07204	GHLMTVR	7
THBD	P07204	LAADQHR	7
THBD	P07204	HIGTDCDSGK	10
THBD	P07204	CQCPAGAALQADGR	14
THBD	P07204	SSVAADVISLLLNGDGGVGR	20
TIGIT	Q495A1	IHSVEGDLR	9
TIGIT	Q495A1	WCLLLIWAQGLR	12
TIGIT	Q495A1	ALRIHSVEGDLR	12
TIGIT	Q495A1	IFLEVLESSVAEHGAR	16
TIGIT	Q495A1	GEDCAELHDYFNVLSYR	17
TNF	P01375	MSTESMIR	8
TNF	P01375	ANALLANGVELR	12
TNF	P01375	VNLLSAIKSPCQR	13
TNF	P01375	DLSLISPLAQAVR	13
TNF	P01375	IAVSYQTKVNLLSAIK	16
TNFRSF9	Q07011	TCDICR	6
TNFRSF9	Q07011	GVFRTR	6
TNFRSF9	Q07011	SLQDPCSNCPAGTFCDNNR	19
TNFRSF9	Q07011	NQICSPCPPNSFSSAGGQR	19
TNFRSF9	Q07011	MGNSCYNIVATLLLVLNFER	20
TNFSF10	P50591	FQEEIK	6
TNFSF10	P50591	SNTLSSPNSK	10
TNFSF10	P50591	YTSYPDPILLMK	12
TNFSF10	P50591	SGHSFLSNLHLR	12
TNFSF10	P50591	DAEYGLYSIYQGGIFELK	18
TP63	Q9H3D4	VIDAVR	6
TP63	Q9H3D4	KQQVSDSTK	9
TP63	Q9H3D4	LPSVSQLINPQQR	13
TP63	Q9H3D4	VEGNSHAQYVEDPITGR	17
TP63	Q9H3D4	IKESLELMQYLPQHTIETYR	20
TUBB2B	Q9BVA1	INVYYNEATGNK	12
TUBB2B	Q9BVA1	INVYYNEATGNKYVPR	16
TWIST1	Q15672	VMANVR	6
TWIST1	Q15672	VMANVRER	8
TWIST1	Q15672	MASCSYVAHER	11
TWIST1	Q15672	YIDFLYQVLQSDELDSK	17
TWIST1	Q15672	MASCSYVAHERLSYAFSVWR	20
UBE2H	P62256	MDTDVVK	7
UBE2H	P62256	SPSIGFMNK	9
UBE2H	P62256	VDLPDKYPFK	10
UBE2H	P62256	HEVTILGGLNEFVVK	15
UBE2H	P62256	FYGPQGTPYEGGVWK	15
UFSP2	Q9NUQ7	FIQFEPEEDIK	11
UFSP2	Q9NUQ7	LLVDAIHNQLTDMEK	15
UFSP2	Q9NUQ7	ILFVSQGSEIASQGR	15
UFSP2	Q9NUQ7	GTSIVVPEPLHFLLPGK	17
UFSP2	Q9NUQ7	GTSIVVPEPLHFLLPGKK	18
UPK1A	O00322	LGHMDYLFTK	10
UPK1A	O00322	DYMVSNPSLITK	12
UPK1A	O00322	TGNFIPLNEEGCR	13
UPK1A	O00322	RTGNFIPLNEEGCR	14
UPK1A	O00322	AATPEVVFPWPPLCCR	16
VSIR	Q9H7M9	LLGPVDK	7
VSIR	Q9H7M9	GHDVTFYK	8
VSIR	Q9H7M9	GEVQTCSER	9
VSIR	Q9H7M9	VHGAMELQVQTGK	13
VSIR	Q9H7M9	HGLESASDHHGNFSITMR	18
WNT7B	P56706	TCWTTLPK	8
WNT7B	P56706	GYNTHQYTK	9
WNT7B	P56706	CNTCSERTEVFTCK	14
WNT7B	P56706	SYQKPMETDLVYIEK	15
WNT7B	P56706	TSPGADGCDTMCCGR	15
YPEL5	P62699	SELISTR	7
YPEL5	P62699	IFLDHIGGTR	10
YPEL5	P62699	VVNLQYSEVQDR	12
YPEL5	P62699	LGWIYEFATEDSQR	14
YPEL5	P62699	LFSCANCDTILTNR	14
ZEB1	P37275	AESQASSLGQK	11
ZEB1	P37275	VIQPNGNQDER	11
ZEB1	P37275	VGESSEQVSEEK	12
ZEB1	P37275	IADSVNLPLDVVK	13
ZEB1	P37275	IENKPLQEQLSVNQIK	16
ZEB2	O60315	SIIDYTLEK	9
ZEB2	O60315	TLIDLVTDDK	10
ZEB2	O60315	TEPLDFNDYK	10
ZEB2	O60315	ALLLSSVLSEK	11
ZEB2	O60315	SSKPLAPNSNPPTK	14
